# Supplementary material for: Urban Weather Modeling using WRF: Linking Physical Assumptions, Code Implementation, and Observational Needs
Source: Copernicus journal article supplement (doi:10.5194/egusphere-2025-1751), 2025-04-28
Supplement: Supplementary file 1 [file egusphere-2025-1751-supplement.pdf]

# Supplemental material for: Urban Weather Modeling using WRF: Linking Physical Assumptions, Code Implementation, and Observational Needs

Parag Joshi<sup>1</sup>, Tzu-Shun Lin<sup>2</sup>, Cenlin He<sup>2</sup>, and Katia Lamer<sup>1</sup>

<sup>1</sup>Environmental Science and Technologies, Brookhaven National Laboratory, Upton, NY 11973, USA

<sup>2</sup>Research Applications Laboratory, NSF National Center for Atmospheric Research, Boulder, CO 80301, USA

**Correspondence:** Parag Joshi (pjoshi@bnl.gov)

This document contains additional equations not presented in the main manuscript.

## S1 Turbulent Flux

### S1.1 Sensible Heat Flux Parameterizations

Unlike the Bulk model, the SLUCM employs two main formulations for estimating sensible heat fluxes ( $H$ ), one applied to its roof ( $R$ ) and green roof ( $GR$ ) surfaces (eq. 8) and one applied to its wall ( $B$ ) and ground ( $G$ ) surfaces (sup eq. 1). This distinction is made as a consideration for the fact that the roof surfaces are closer to the first atmospheric level, than building walls and ground.

$$\underbrace{H_{[GR,R]}}_{\substack{\text{Lines: [1027,1149]} \\ \text{module\_sf\_urban.F}}} = RHO * CP * CH_{[GR,R]} * UA * (T_{[GR,R]}P - TA), \quad (S1)$$

where  $RHO$  denote the air density at the lowest atmospheric layer and  $CP$  denote the specific heat of dry air at constant pressure. Wind speed at the lowest atmospheric level, denoted as  $UA$ , is used for the roof surfaces and  $CH_{[GR,R,B,G]}$  represent the surface exchange coefficients. Similarly, the air temperature at the lowest atmospheric level of the WRF mesoscale model  $TA$  is employed for roof surface calculations.

### S1.2 Latent Heat Flux Parameterizations

When calculating the latent heat flux for each of its surfaces ( $ELE_{[surface]}$ ), the SLUCM similarly considers the surface exchange coefficients for transport of moisture/heat ( $CH$ ), the minimum moisture availability at the surfaces ( $BET$ ), the wind speed, and the moisture gradient in the form of the difference in moisture at the surface ( $QS0$ ) and in the atmosphere.

$$\underbrace{ELE_{[R]}}_{\substack{\text{Lines [1028]} \\ \text{module\_sf\_urban.F}}} = RHO * EL * CH_{[R]} * UA * BET_{[R]} * (QS0_{[R]} - QA), \quad (S2)$$

where EL represents the latent heat of vaporization. For the surface closest to the lowest atmospheric level (roof  $R$ ) the lower atmospheric level wind ( $UA$ ) and moisture ( $QA$ ) are employed f.

## 20 S2 Radiative Flux

### S2.1 Shortwave Radiative Flux Parameterizations

In the SLUCM, the SW radiation incident on the ground surface ( $rs_g$ ) is comprised of three components:

$$\begin{aligned}
 \underbrace{rs_g}_{\substack{\text{Line 3659} \\ \text{module\_sf\_bep\_bem.F}}} &= \underbrace{rs_{g \rightarrow g}}_{\substack{\text{T1: Sky SWR incident on the} \\ \text{illuminated portion of the ground}}} + \underbrace{rs_{dif} \times f_{sg}}_{\substack{\text{T2: Diffuse SWR from the sky} \\ \text{to the ground surface}}} + \underbrace{\sum_{ju=1, nu} (rs_{s \rightarrow ju}^W + rs_{s \rightarrow ju}^E)(1 - pb(z_{ju+1})) f_{wg}}_{\substack{\text{T3: Portion of total SWR at the wall surface that passed} \\ \text{through the east \& west walls that is seen by the ground}}} + \\
 &+ \underbrace{\sum_{ju=1, nu} (rs_{ju}^W + rs_{ju}^E) pb(z_{ju+1}) albw \times f_{wg}}_{\substack{\text{T4: Total SWR at the east \& west walls} \\ \text{that is reflected towards the ground by the portion of buildings at that level}}}, \quad (S3)
 \end{aligned}$$

with  $f_{wg}$  representing the view factor of the ground looking at the wall,  $f_{sg}$  signifying the sky view factor from the ground,  
 25  $albw$  the albedo of the wall.  $pb(z_{ju+1})$  can be thought of as a view factor between the  $ju^{th}$  element of the wall and the sky. N

### S2.2 Longwave Radiative Flux Parameterizations

In the SLUCM, net LWR at the ground surface ( $RG$ ) has additional terms to account for LWR emitted from the wall surface towards the ground surface (RG1-T2) as well as for reflected LWR reaching the ground surface (RG2)

$$\underbrace{RG1}_{\substack{\text{Line 1284} \\ \text{module\_sf\_urban.F}}} = EPSG \left( \underbrace{RX \times VFGS}_{\substack{\text{T1: LWR from the sky} \\ \text{seen by the ground}}} + \underbrace{EPSB \times SIG \times TBP^4 \times VFGW}_{\substack{\text{T2: LWR emitted by the} \\ \text{wall seen by the ground}}} - \underbrace{SIG \times TGP^4}_{\substack{\text{T3: LWR from the} \\ \text{ground to the sky}}} \right), \quad (S4)$$

$$\begin{aligned}
 \underbrace{RG2}_{\substack{\text{Line 1293} \\ \text{module\_sf\_urban.F}}} &= EPSG \left( \underbrace{RX \times VFWS(1 - EPSB)VFGW}_{\substack{\text{T1: LWR from sky seen by the wall} \\ \text{reflected towards the ground}}} + \underbrace{EPSG \times SIG \times TGP^4 \times VFWS(1 - EPSB)VFGW}_{\substack{\text{T2: LWR from ground seen by wall} \\ \text{reflected towards the ground}}} + \right. \\
 &\quad \left. \underbrace{EPSB \times SIG \times TBP^4 \times VFWS(1 - EPSB)VFGW}_{\substack{\text{T3: LWR from wall seen by opposite} \\ \text{wall reflected towards the ground}}} \right), \quad (S5)
 \end{aligned}$$

30

The outgoing LWR flux depend on the surface temperature at the previous timestep where  $TGP$  stands for the ground temperature and  $TBP$  stands for the wall temperature.

In the BEP-BEM model, the incident LWR at the ground surface ( $rlg$ ) is comprised of four components, including a weighted average of the contribution of the wall and window surface:

$$\begin{aligned}
 \underbrace{rlg}_{\substack{\text{Line: 3542} \\ \text{module\_sf\_bep\_bem.F}}} &= \underbrace{rl \times fsg}_{\substack{\text{T1: LWR from sky} \\ \text{seen by ground}}} + 2 \times \underbrace{\sum_{ju=1, nu} rl(1 - pb(z_{ju+1}))fwg}_{\substack{\text{T2: Portion of LWR from sky passed through} \\ \text{east \& west walls that is seen by ground}}} + \\
 35 \quad &\underbrace{\left( \sum_{ju=1, nu} \sigma(emw(1 - pwin)(tw^{4,E} + tw^{4,W}))pb(z_{ju+1}) \times fwg + emwin \times pwin(twlev^{4,E} + twlev^{4,W}) \right)}_{\substack{\text{T3: LWR emitted by the east} \\ \text{\& west walls seen by ground}}} + \\
 &\underbrace{\sum_{ju=1, nu} (rlw^E + rlw^W)pb(z_{ju+1})(1 - emw(1 - pwin) - emwin * pwin)fwg}_{\substack{\text{T4: Total LWR at the east \& west} \\ \text{walls reflected towards ground}}},
 \end{aligned} \tag{S6}$$

where  $rl$  is the LWR from the sky. The outgoing LWR flux from the east and west wall depends on their surface temperature at the previous timestep, respectively  $tw^E$  and  $tw^W$ .
